# Supplementary material for: Simulated Gastric and Intestinal Fluid Electrolyte Solutions as an Environment for the Adsorption of Apple Polyphenols onto β-Glucan
Source: MDPI journal article supplement (doi:10.3390/molecules27196683), 2022-10-08
Supplement: s1 [file s1]

Table S1 Phenolic compounds from peel and flesh of apples detected before the adsorption, and after the adsorption in the gastric and intestinal fluid electrolyte solutions, with maximums of UV/Vis spectra

|                 |                                                 |                            | $\lambda_{\text{max}}$                                                |                                                                   |
|-----------------|-------------------------------------------------|----------------------------|-----------------------------------------------------------------------|-------------------------------------------------------------------|
| peak assignment | phenolic compound                               | phenolic compound subclass | before and after adsorption in the gastric fluid electrolyte solution | after the adsorption in the intestinal fluid electrolyte solution |
| Peel            |                                                 |                            |                                                                       |                                                                   |
| 1               | procyanidin B1                                  | flavan-3-ol                | 278                                                                   |                                                                   |
| 2               | (+)-catechin                                    | flavan-3-ol                | 276                                                                   |                                                                   |
| 3               | procyanidin B2                                  | flavan-3-ol                | 278                                                                   |                                                                   |
| 4               | chlorogenic acid                                | phenolic acid              | sh 292, 326                                                           | sh 278, 326                                                       |
| 5               | chlorogenic acid isomer 2*                      | phenolic acid              | sh 292, 328                                                           | sh 278, 330                                                       |
| 6               | (-)-epicatechin                                 | flavan-3-ol                | 278                                                                   |                                                                   |
| 8               | quercetin-3-galactoside                         | flavonol                   | 256,356                                                               | 256,356                                                           |
| 9+10            | quercetin-3-glucoside + quercetin-3-rutinoside* | flavonols                  | 256,356                                                               | 256,356                                                           |
| 11              | quercetin derivative 1*                         | flavonol                   | 256,356                                                               | 256,356                                                           |
| 12              | quercetin derivative 2*                         | flavonol                   | 254,356                                                               | 254,356                                                           |
| 13              | quercetin derivative 3*                         | flavonol                   | 262,356                                                               | 268,352                                                           |
| 14              | quercetin-3-xyloside                            | flavonol                   | 256,356                                                               | 256,354                                                           |
| 15              | quercetin-3-rhamnoside                          | flavonol                   | 258,352                                                               | 256,352                                                           |
|                 | phenolic acid isomer 1*                         | phenolic acid              |                                                                       | 316                                                               |
| Flesh           |                                                 |                            |                                                                       |                                                                   |
| 1               | procyanidin B1                                  | flavan-3-ol                | 278                                                                   |                                                                   |
| 2               | (+)-catechin                                    | flavan-3-ol                | 276                                                                   |                                                                   |
| 3               | procyanidin B2                                  | flavan-3-ol                | 278                                                                   |                                                                   |
| 4               | chlorogenic acid                                | phenolic acid              | sh 292, 326 #                                                         | sh 278, 326                                                       |
| 5               | chlorogenic acid isomer 2*                      | phenolic acid              | sh 292, 328                                                           | sh 278, 330                                                       |
| 7               | phloretin-2-xyloglucoside*                      | dihydrochalcone            | 274                                                                   | 272                                                               |
|                 | phenolic acid isomer 1*                         | phenolic acid              |                                                                       | 316                                                               |

\* Tentative identification

#chlorogenic acid detected before the adsorption, but not after the adsorption in the gastric fluid electrolyte solution

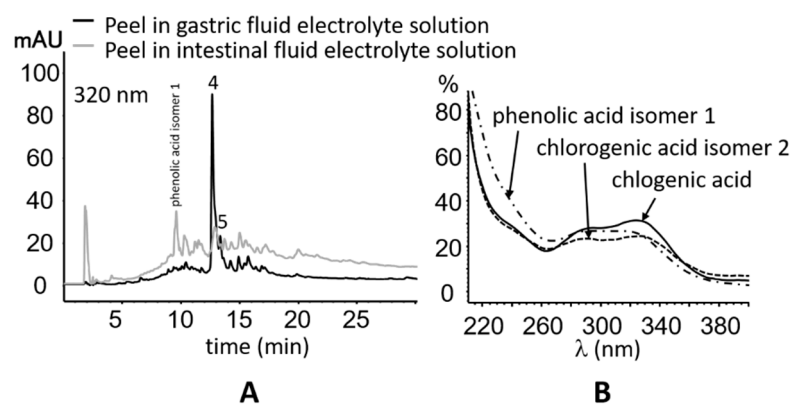

Figure S1. A) the chromatogram of apple peel after the adsorption in the simulated gastric and intestinal fluid electrolyte solutions scanned at 320 nm with detected phenolic acids. B) UV/Vis spectra of phenolic acids. Detected phenolic acids. phenolic acid isomer 1\*, 4 – chlorogenic acid, 5 – chlorogenic acid isomer 2\*. \* - tentative identification

Table S2. Regression analysis of the data of individual phenolic compounds adsorbed per mass of  $\beta$ -glucan ( $\text{mg g}^{-1}$ ). Comparison of gastric and intestinal fluid electrolyte solutions.

| Term                                       | Coefficient<br>t | Standard error of<br>Coefficient | P-Value |
|--------------------------------------------|------------------|----------------------------------|---------|
| gastric fluid electrolyte solution case    | 0.03497          | 0.00929                          | 0.000   |
| intestinal fluid electrolyte solution case | 0.1812           | 0.0114                           | 0.000   |

In equation  $y = ax_1 + bx_2$  the  $x_1$  and  $x_2$  are volumes of extract ( $\mu\text{l}$ ) in gastric or intestinal fluid electrolyte solution cases, respectively. Coefficients are slopes a and b. The differences of slopes are statistically significant.

Table S3. Regression analysis of the data of individual phenolic compounds adsorbed per mass of  $\beta$ -glucan ( $\text{mg g}^{-1}$ ) in gastric and intestinal fluid electrolyte solutions. Comparison of 15 and 30  $\text{mg l}^{-1}$  of initial  $\beta$ -glucan concentration

| Term                                          | Coefficient | Standard error of<br>Coefficient | P-Value |
|-----------------------------------------------|-------------|----------------------------------|---------|
| 15 $\text{mg l}^{-1}$ of $\beta$ -glucan case | 0.1244      | 0.0113                           | 0.000   |
| 30 $\text{mg l}^{-1}$ of $\beta$ -glucan case | 0.0626      | 0.0113                           | 0.000   |

In equation  $y = ax_1 + bx_2$  the  $x_1$  and  $x_2$  are volumes of extract ( $\mu\text{l}$ ) in 15 and 30  $\text{mg l}^{-1}$  of  $\beta$ -glucan cases, respectively. Coefficients are slopes a and b. The differences of slopes are statistically significant.

Table S4. Multiple regression analysis of the data of individual phenolic compounds adsorbed per mass of  $\beta$ -glucan ( $\text{mg g}^{-1}$ ) in gastric and intestinal fluid electrolyte solutions, with 15 and 30  $\text{mg l}^{-1}$  of initial  $\beta$ -glucan concentration, with different volumes of polyphenol extract (100, 200 and 300  $\mu\text{l}$ )

| Term indicators                                                  | Coefficient | Standard error of Coefficient | P-Value |
|------------------------------------------------------------------|-------------|-------------------------------|---------|
| intestinal fluid electrolyte solution                            | -0.0288     | 0.0100                        | 0.004   |
| 15 $\text{mg l}^{-1}$                                            | 0.02690     | 0.00497                       | 0.000   |
| intestinal fluid, peel phenolics, 15 $\text{mg l}^{-1}$          | 0.1328      | 0.0116                        | 0.000   |
| intestinal fluid q3gluq3rut, 15 $\text{mg l}^{-1}$               | 0.3688      | 0.0265                        | 0.000   |
| intestinal fluid, chlorogenic acid, 30 $\text{mg l}^{-1}$        | 0.1289      | 0.0172                        | 0.000   |
| intestinal fluid, chlorogenic acid, 15 $\text{mg l}^{-1}$        | 0.5195      | 0.0239                        | 0.000   |
| intestinal fluid, quercetin-3-rhamnoside, 15 $\text{mg l}^{-1}$  | 0.5735      | 0.0239                        | 0.000   |
| intestinal fluid, quercetin-3-galactoside, 15 $\text{mg l}^{-1}$ | 0.1650      | 0.0265                        | 0.000   |
| (-)-epicatechin                                                  | 0.1406      | 0.0161                        | 0.000   |
| quercetin-3-galactoside                                          | 0.0427      | 0.0133                        | 0.001   |
| q3glu q3rut                                                      | 0.0410      | 0.0133                        | 0.002   |
| quercetin derivative 2                                           | 0.0343      | 0.0119                        | 0.004   |
| quercetin-3-xyloside                                             | 0.0359      | 0.0119                        | 0.003   |
| quercetin-3-rhamnoside, 30 $\text{mg l}^{-1}$                    | 0.1363      | 0.0163                        | 0.000   |

Standard deviation of residuals= 11.92,  $r^2= 90.97$

In equation  $y = ax_1 + bx_2 + cx_3 + \dots$ , the  $x_1, x_2, \dots$  are volumes of extract ( $\mu\text{l}$ ) in the indicated cases. The  $x_a$  are zeroed for all other cases. The coefficients are the slopes  $a, b, \dots$ . The coefficients are statistically significant.

Note that the slope (coefficient) is negative for the intestinal fluid variable. The explanation is that overall increase is captured by the 15  $\text{mg l}^{-1}$  in peel cases and by certain polyphenol cases.
